# Supplementary material for: Intratumoral high endothelial venules in solid tumors: a pooled study
Source: PubMed Central journal article supplement (PMC11260642; doi:10.3389/fimmu.2024.1401118), 2024-07-08
Supplement: DataSheet_1.pdf [file DataSheet_1.pdf]

## Additional file

**Table S1. Newcastle-Ottawa Scale for assessing the quality of studies in quantitative analysis**

| Study ID                   | Year | Representativeness of the exposed cohort | Selection of the non-exposed cohort | Ascertainment of exposure | Demonstration that outcome of interest was not present at start of study | Comparability of cohorts on the basis of the design or analysis (a) | Comparability of cohorts on the basis of the design or analysis (b) | Assessment of outcome | Was follow-up long enough for outcomes to occur | Adequacy of follow-up of cohorts | Total scores |
|----------------------------|------|------------------------------------------|-------------------------------------|---------------------------|--------------------------------------------------------------------------|---------------------------------------------------------------------|---------------------------------------------------------------------|-----------------------|-------------------------------------------------|----------------------------------|--------------|
| Martinet L, <i>et al</i>   | 2011 | ★                                        | ★                                   | ★                         | ★                                                                        | ★                                                                   | ★                                                                   | ★                     | ★                                               | ★                                | 9            |
| Okayama H, <i>et al</i>    | 2011 | ★                                        | ★                                   | ★                         | ★                                                                        | ★                                                                   | ★                                                                   | ★                     | ☆                                               | ★                                | 8            |
| Song IH, <i>et al</i>      | 2017 | ★                                        | ★                                   | ★                         | ★                                                                        | ★                                                                   | ☆                                                                   | ★                     | ☆                                               | ★                                | 7            |
| Wirsing AM, <i>et al</i>   | 2018 | ★                                        | ★                                   | ★                         | ★                                                                        | ★                                                                   | ☆                                                                   | ★                     | ☆                                               | ★                                | 7            |
| Sebestyén T, <i>et al</i>  | 2018 | ★                                        | ★                                   | ★                         | ★                                                                        | ★                                                                   | ☆                                                                   | ★                     | ★                                               | ★                                | 8            |
| Hong SA, <i>et al</i>      | 2020 | ★                                        | ★                                   | ★                         | ★                                                                        | ★                                                                   | ★                                                                   | ★                     | ☆                                               | ★                                | 8            |
| Karpathiou G, <i>et al</i> | 2021 | ★                                        | ★                                   | ★                         | ★                                                                        | ☆                                                                   | ☆                                                                   | ★                     | ★                                               | ★                                | 7            |
| Park HS, <i>et al</i>      | 2021 | ★                                        | ★                                   | ★                         | ★                                                                        | ★                                                                   | ★                                                                   | ★                     | ★                                               | ☆                                | 8            |
| Li H, <i>et al</i>         | 2022 | ★                                        | ★                                   | ★                         | ★                                                                        | ★                                                                   | ★                                                                   | ★                     | ★                                               | ☆                                | 8            |
| Asrir A, <i>et al</i>      | 2022 | ★                                        | ★                                   | ★                         | ★                                                                        | ★                                                                   | ★                                                                   | ☆                     | ☆                                               | ☆                                | 7            |
| Karpathiou G, <i>et al</i> | 2022 | ★                                        | ★                                   | ★                         | ★                                                                        | ★                                                                   | ★                                                                   | ☆                     | ☆                                               | ☆                                | 6            |
| Zhan Z, <i>et al</i>       | 2023 | ★                                        | ★                                   | ★                         | ★                                                                        | ★                                                                   | ★                                                                   | ★                     | ★                                               | ★                                | 9            |
| Hyytiäinen A, <i>et al</i> | 2023 | ★                                        | ★                                   | ★                         | ★                                                                        | ★                                                                   | ☆                                                                   | ★                     | ★                                               | ★                                | 8            |

☆: scored 0, ★: scored 1.

**Table S2. Association between positive-HEVs and clinicopathological parameters**

| <b>Clinicopathological parameters</b>  | <b>No.of studies</b> | <b>No. of patients</b> | <b>Effect model</b> | <b>Pooled OR (95%CI)</b>        | <b><i>P</i></b> | <b>Heterogeneity I<sup>2</sup>(%)</b> | <b><i>P</i></b> | <b>Relationship with positive-HEVs</b> |
|----------------------------------------|----------------------|------------------------|---------------------|---------------------------------|-----------------|---------------------------------------|-----------------|----------------------------------------|
| Sex<br>(Male vs. Female)               | 6                    | 1192                   | Random              | 0.86,<br>(0.50,1.49)            | 0.58            | 69                                    | < 0.01          | No statistical significance            |
| Histologic grade<br>(III vs. I-II)     | 4                    | 418                    | fixed               | 1.74<br>(1.11, 2.73)            | 0.01            | 48                                    | 0.12            | Positive                               |
| LVI<br>(positive vs. negative)         | 3                    | 237                    | fixed               | 1.05<br>(0.60, 1.86)            | 0.85            | 13                                    | 0.32            | No statistical significance            |
| Clinical stage<br>(III-IV vs. I-II)    | 3                    | 829                    | Random              | 0.86<br>(0.40, 1.85)            | < 0.01          | 78                                    | 0.01            | No statistical significance            |
| Invasion of depth<br>(I-II vs. III-IV) | 6                    | 1090                   | Random              | 0.91<br>(0.43,1.91)             | 0.80            | 83                                    | 0.01            | No statistical significance            |
| Lymph node status<br>(N- vs N+)        | 6                    | 1077                   | fixed               | 1.61<br>(1.22, 2.11)            | < 0.01          | 34                                    | 0.18            | Positive                               |
| Distant metastasis<br>(M0 vs. M1)      | 3                    | 362                    | fixed               | <del>3.32</del><br>(1.27, 7.87) | 0.01            | 0                                     | 0.58            | Positive                               |

Abbreviation: LVI lymphovascular invasion, OR odds ratio

**Figure S1.**

**A**

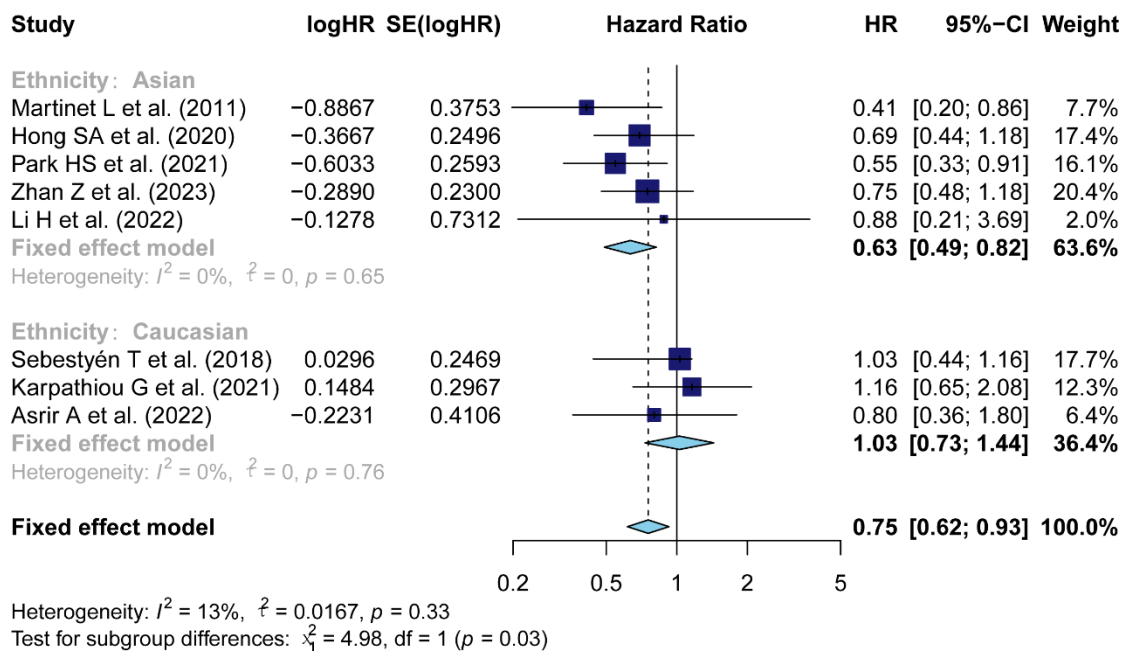

**B**

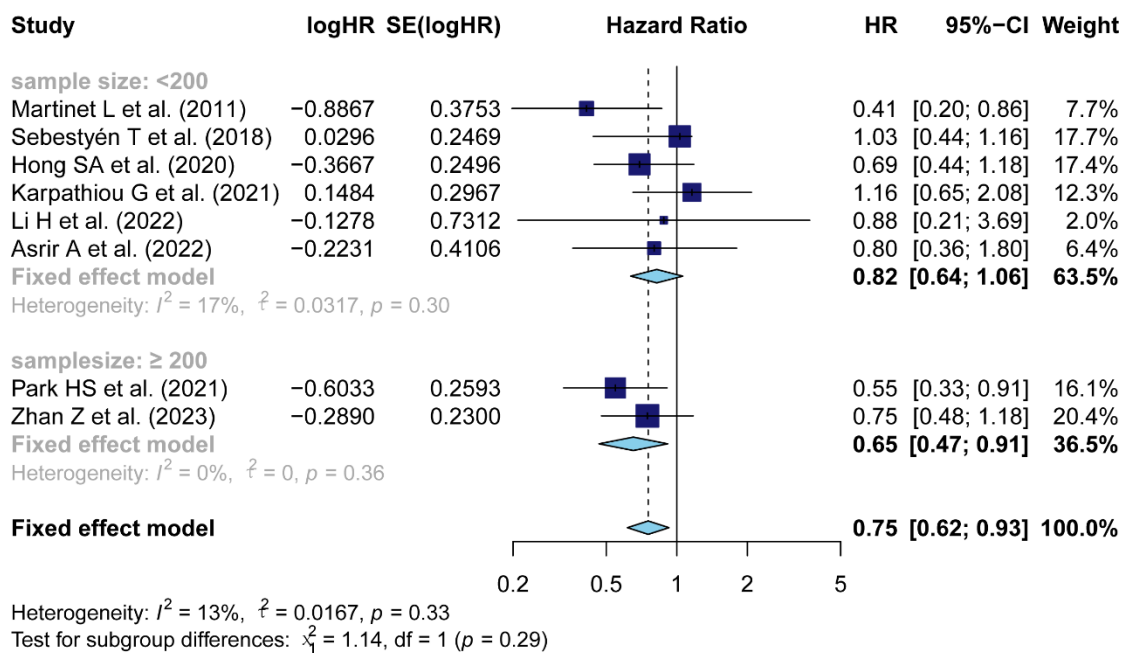

## C

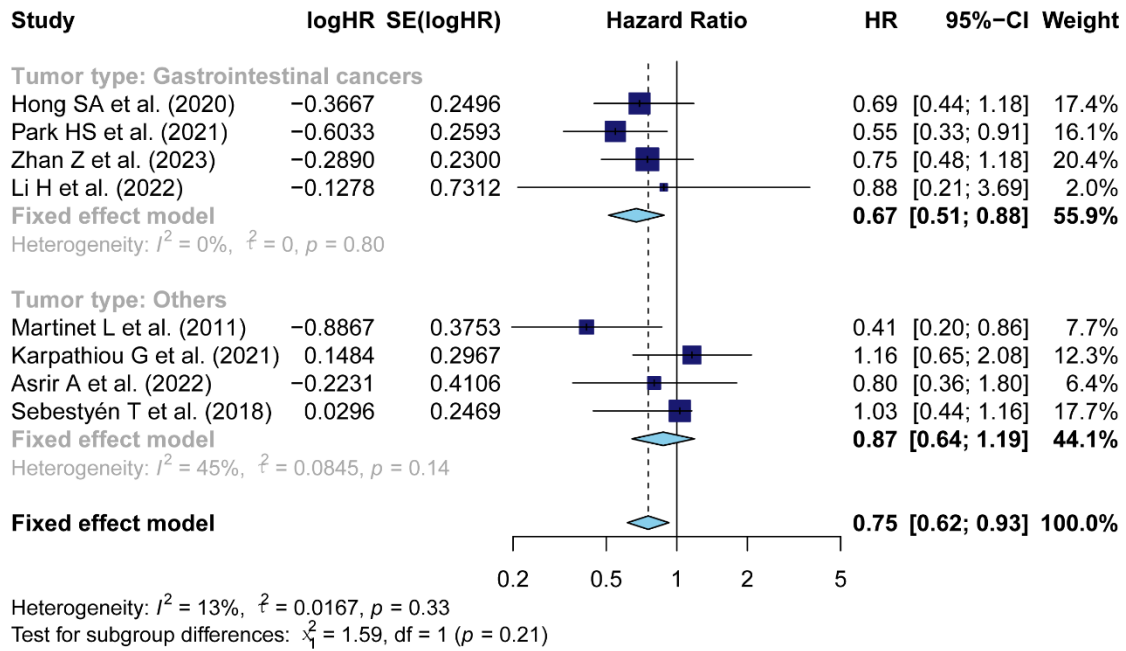

## D

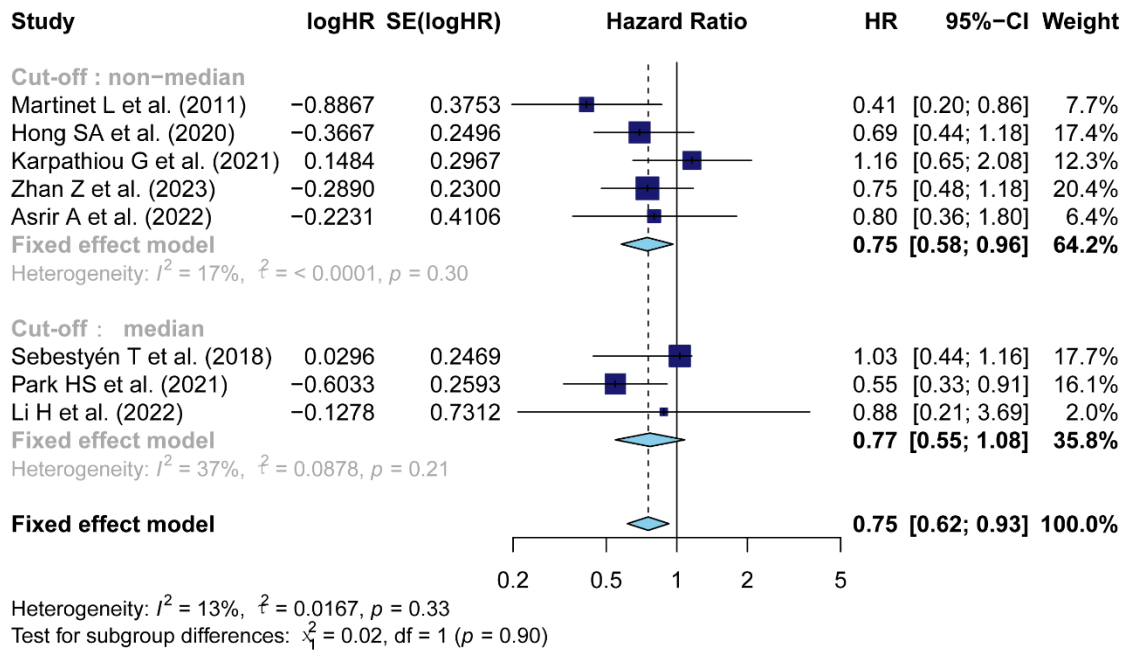

# E

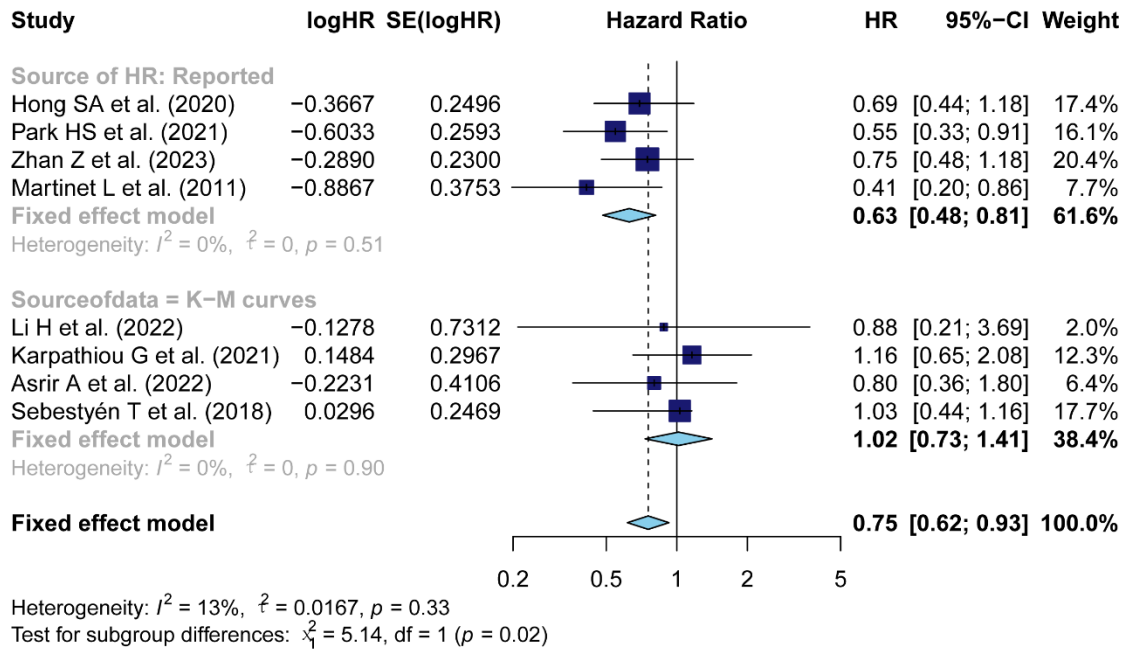

**Figure S1.** Subgroup analysis conducted for survival outcome regarding OS, stratified by (A) ethnicity, (B) sample size, (C) tumor type, (D) cut-off criteria, and (E) source of HR
